# Supplementary material for: Gaps in our understanding of ice-nucleating particle sources exposed by global simulation of the UK climate model
Source: Copernicus journal article supplement (doi:10.5194/egusphere-2024-1538), 2024-06-17
Supplement: Supplementary file 1 [file egusphere-2024-1538-supplement.pdf]

# Supplementary material for: Gaps in our understanding of ice-nucleating particle sources exposed by global simulation of the UK climate model

Ross J. Herbert<sup>1</sup>, Alberto Sanchez-Marroquin<sup>1,2</sup>, Daniel P. Grosvenor<sup>1,3</sup>, Kirsty J. Pringle<sup>4</sup>, Stephen R. Arnold<sup>1</sup>, Benjamin J. Murray<sup>1</sup>, and Kenneth S. Carslaw<sup>1</sup>

<sup>1</sup>Institute for Climate and Atmospheric Science, School of Earth and Environment, University of Leeds, Leeds, LS2 9JT, UK

<sup>2</sup>Barcelona Supercomputing Center (BSC-CNS), Barcelona, Spain

<sup>3</sup>Met Office Hadley Centre, Exeter, Fitzroy Road, Exeter, Devon, EX1 3PB, UK

<sup>4</sup>Edinburgh Parallel Computing Centre, Bayes Centre, University of Edinburgh, EH8 9BT, UK

**Correspondence:** Ross J. Herbert (R.J.Herbert@leeds.ac.uk)

## 1 Location of Southern Ocean INP measurements

In Sect. 4.2.3 of the manuscript we compare two methods for representing marine-sourced INP. For the comparison we use measurements taken the ACE measurement campaign (Tatzelt et al., 2021) and the CAPRICORN campaign (McCluskey et al., 2018b). Figure S1 shows the coverage of these measurements throughout the Southern Ocean.

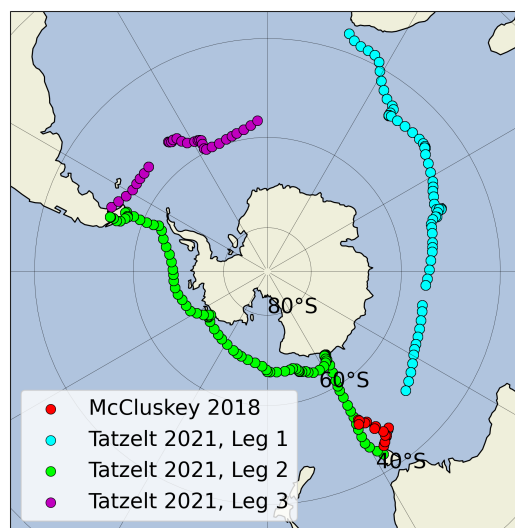

**Figure S1.** Location of INP measurements used to evaluate the two marine-source INP approaches. Data include measurements from Tatzelt et al. (2021) during the Antarctic Circumnavigation Expedition (ACE) in the Austral summer of 2016/17, and from McCluskey et al. (2018a) during the Clouds, Aerosols, Precipitation, Radiation, and atmospheric Composition Over the southern ocean (CAPRICORN) campaign in March 2016.

## 5 2 Sensitivity of model parameterization bias for each representation of dust ice-nucleating activity

Figure S2 shows the sensitivity of the INP model to the choice of parameterization used to represent the ice-nucleating ability of dust. This is similar to Fig. 11 in the main manuscript but here we show the sensitivity of the parameterization temperature bias as a function of measurement temperature for the three methods. The figure shows using the fertile soil assumption reduces bias from 21.8 (Fig. S2b) to 17.7 (Fig. S2d) and visually reduces some of the temperature-dependent bias in the representation of INPs in the model. Figure S4 demonstrates this reduction in temperature dependence using the  $\Delta P_{\text{bias}}$  value.

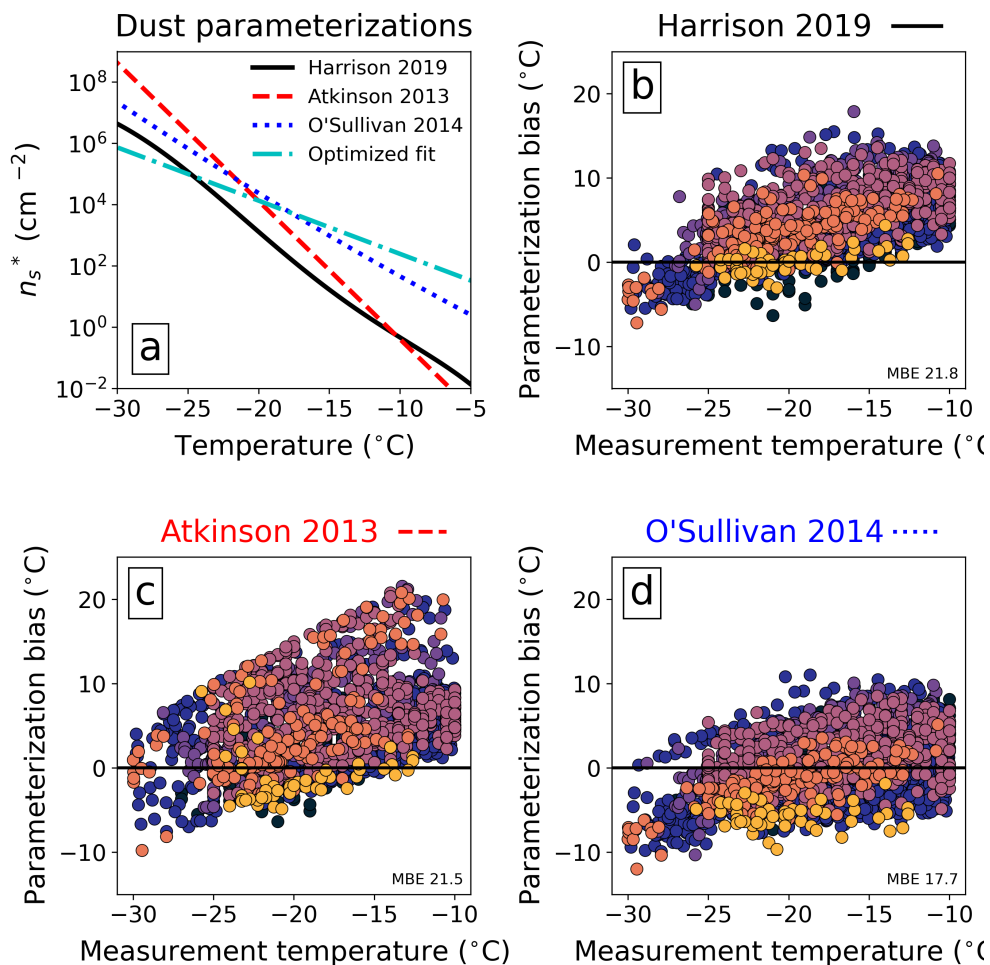

**Figure S2.** Sensitivity of simulated dust INP concentration to parameterizations of ice-nucleating activity. Same as Fig. 12 in manuscript but showing parameterization temperature bias. (a) temperature-dependent  $n_s$  curves of the three parameterizations, where  $n_s$  for the Harrison et al. (2019) and Atkinson et al. (2013) curves are scaled by 5% (accounting for dust K-feldspar content) to make all descriptions comparable. Panels (b), (c), and (d) show the parameterization temperature bias in the simulated  $N_{\text{INP}}$  as a function of measurement temperature in all regions for the Harrison et al. (2019), Atkinson et al. (2013), and O'Sullivan et al. (2014) parameterizations.

### 3 Comparing the desert soils parameterization against in-situ dust samples from desert regions

In Sects. 5.1 and 5.2 we discuss the distinction between fertile soils (that contain organic material attached to the dust) and desert soils (that are largely abiotic). Figure S3 shows that the desert soil parameterization (Harrison et al., 2019), based on a 5% K-feldspar content, compares well against airborne dust samples from desert regions. This suggests dust emissions from desert regions are well represented as desert soils, and will be poorly represented by the fertile soil parameterization.

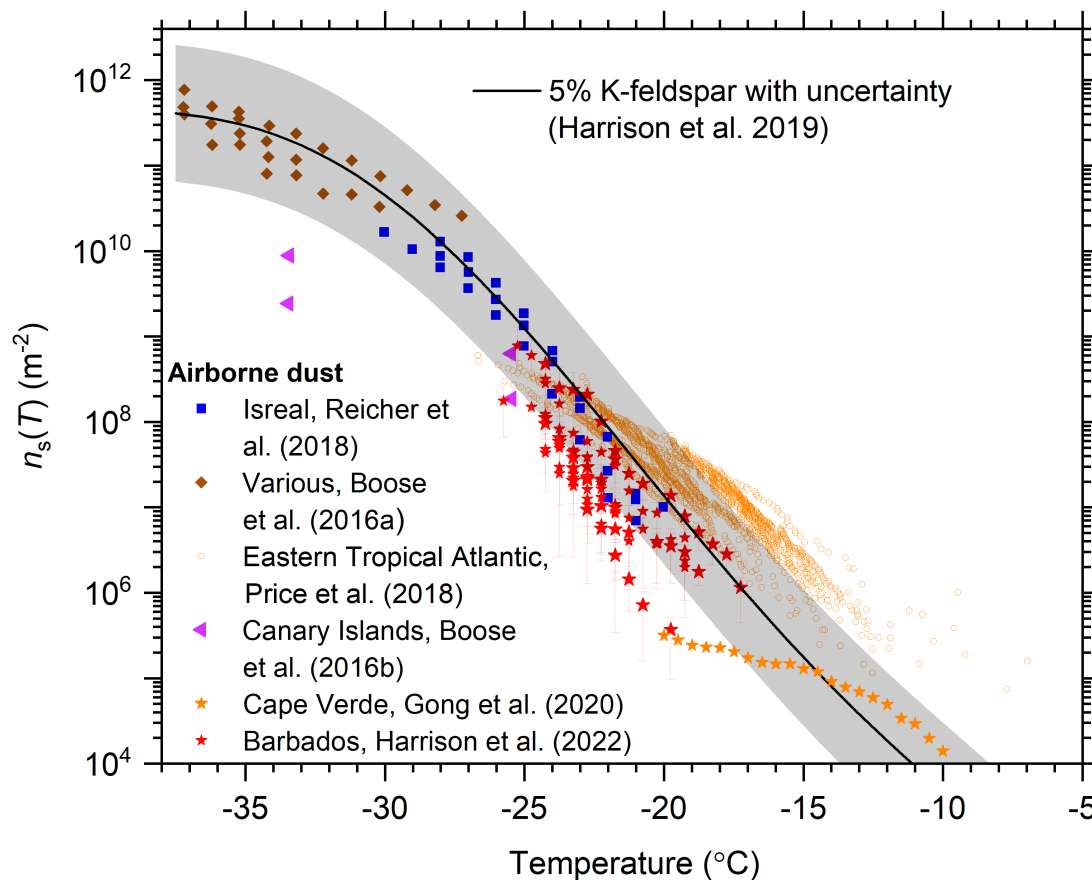

**Figure S3.** Ice-nucleating active site density ( $n_s$ ) as a function of temperature from in-situ measurements of airborne dust samples (symbols) and a parameterization from Harrison et al. (2019) (solid line and grey shading) that assumes 5% of the dust surface area is K-feldspar. The measurements are taken from Reicher et al. (2018) (blue squares), Boose et al. (2016b) (red diamonds), Price et al. (2018) (empty circles), Boose et al. (2016a) (magenta triangles), Gong et al. (2020) (orange stars), and Harrison et al. (2022) (red triangles with uncertainty ranges). The grey shading around the solid black line represents the parameterization uncertainty.

## References

- Atkinson, J., Murray, B., Woodhouse, M., Whale, T., Baustian, K., Carslaw, K., Dobbie, S., O'Sullivan, D., and Malkin, T.: The importance of feldspar for ice nucleation by mineral dust in mixed-phase clouds, *Nature*, 498, <https://doi.org/10.1038/nature12278>, 2013.
- Boose, Y., Sierau, B., García, M. I., Rodríguez, S., Alastuey, A., Linke, C., Schnaiter, M., Kupiszewski, P., Kanji, Z. A., and Lohmann, U.: Ice nucleating particles in the Saharan Air Layer, *Atmospheric Chemistry and Physics*, 16, 9067–9087, <https://doi.org/10.5194/acp-16-9067-2016>, 2016a.
- Boose, Y., Welti, A., Atkinson, J., Ramelli, F., Danielczok, A., Bingemer, H. G., Plötze, M., Sierau, B., Kanji, Z. A., and Lohmann, U.: Heterogeneous ice nucleation on dust particles sourced from nine deserts worldwide – Part 1: Immersion freezing, *Atmospheric Chemistry and Physics*, 16, 15 075–15 095, <https://doi.org/10.5194/acp-16-15075-2016>, 2016b.
- 25 Gong, X., Wex, H., van Pinxteren, M., Triesch, N., Fomba, K. W., Lubitz, J., Stolle, C., Robinson, T.-B., Müller, T., Herrmann, H., and Stratmann, F.: Characterization of aerosol particles at Cabo Verde close to sea level and at the cloud level – Part 2: Ice-nucleating particles in air, cloud and seawater, *Atmospheric Chemistry and Physics*, 20, 1451–1468, <https://doi.org/10.5194/acp-20-1451-2020>, publisher: Copernicus GmbH, 2020.
- Harrison, A. D., Lever, K., Sanchez-Marroquin, A., Holden, M. A., Whale, T. F., Tarn, M. D., McQuaid, J. B., and Murray, B. J.: The ice-nucleating ability of quartz immersed in water and its atmospheric importance compared to K-feldspar, *Atmospheric Chemistry and Physics*, 19, 11 343–11 361, <https://doi.org/10.5194/acp-19-11343-2019>, 2019.
- Harrison, A. D., O'Sullivan, D., Adams, M. P., Porter, G. C. E., Blades, E., Brathwaite, C., Chewitt-Lucas, R., Gaston, C., Hawker, R., Krüger, O. O., Neve, L., Pöhlker, M. L., Pöhlker, C., Pöschl, U., Sanchez-Marroquin, A., Sealy, A., Sealy, P., Tarn, M. D., Whitehall, S., McQuaid, J. B., Carslaw, K. S., Prospero, J. M., and Murray, B. J.: The ice-nucleating activity of African mineral dust in the Caribbean boundary layer, *Atmospheric Chemistry and Physics*, 22, 9663–9680, <https://doi.org/10.5194/acp-22-9663-2022>, 2022.
- 35 McCluskey, C. S., Hill, T. C. J., Humphries, R. S., Rauker, A. M., Moreau, S., Stratton, P. G., Chambers, S. D., Williams, A. G., McRobert, I., Ward, J., Keywood, M. D., Harnwell, J., Ponsonby, W., Loh, Z. M., Krummel, P. B., Protat, A., Kreidenweis, S. M., and DeMott, P. J.: Observations of Ice Nucleating Particles Over Southern Ocean Waters, *Geophysical Research Letters*, 45, 11,989–11,997, <https://doi.org/https://doi.org/10.1029/2018GL079981>, 2018a.
- 40 McCluskey, C. S., Ovadnevaite, J., Rinaldi, M., Atkinson, J., Belosi, F., Ceburnis, D., Marullo, S., Hill, T. C. J., Lohmann, U., Kanji, Z. A., O'Dowd, C., Kreidenweis, S. M., and DeMott, P. J.: Marine and Terrestrial Organic Ice-Nucleating Particles in Pristine Marine to Continentally Influenced Northeast Atlantic Air Masses, *Journal of Geophysical Research: Atmospheres*, 123, 6196–6212, <https://doi.org/https://doi.org/10.1029/2017JD028033>, 2018b.
- O'Sullivan, D., Murray, B. J., Malkin, T. L., Whale, T. F., Umo, N. S., Atkinson, J. D., Price, H. C., Baustian, K. J., Browse, J., and Webb, M. E.: Ice nucleation by fertile soil dusts: relative importance of mineral and biogenic components, *Atmospheric Chemistry and Physics*, 14, 1853–1867, <https://doi.org/10.5194/acp-14-1853-2014>, 2014.
- Price, H. C., Baustian, K. J., McQuaid, J. B., Blyth, A., Bower, K. N., Choularton, T., Cotton, R. J., Cui, Z., Field, P. R., Gallagher, M., Hawker, R., Merrington, A., Miltenberger, A., Neely III, R. R., Parker, S. T., Rosenberg, P. D., Taylor, J. W., Trembath, J., Vergara-Temprado, J., Whale, T. F., Wilson, T. W., Young, G., and Murray, B. J.: Atmospheric Ice-Nucleating Particles in the Dusty Tropical Atlantic, *Journal of Geophysical Research: Atmospheres*, 123, 2175–2193, <https://doi.org/https://doi.org/10.1002/2017JD027560>, 2018.
- 50 Reicher, N., Segev, L., and Rudich, Y.: The Welzmann Supercooled Droplets Observation on a Microarray (WISDOM) and application for ambient dust, *Atmospheric Measurement Techniques*, 11, 233–248, <https://doi.org/10.5194/amt-11-233-2018>, 2018.

Tatzelt, C., Henning, S., Welti, A., Baccharini, A., Hartmann, M., Gysel-Beer, M., van Pinxteren, M., Modini, R. L., Schmale, J., and Stratmann, F.: Circum-Antarctic abundance and properties of CCN and INP, *Atmospheric Chemistry and Physics Discussions*, 2021, 1–35, <https://doi.org/10.5194/acp-2021-700>, 2021.
